# Supplementary material for: Evaluation of Pretreatment Albumin–Bilirubin Grade as a Better Prognostic Factor Compared to Child–Pugh Classification in Patients with Hepatocellular Carcinoma Receiving Transarterial Chemoembolization Combined with Radiotherapy
Source: MDPI journal article supplement (doi:10.3390/jpm13020354), 2023-02-17
Supplement: s1 [file s1]

Supplementary Table S1-1. The detailed relationship between pretreatment ALBI\* grade and Child-Pugh score

| ALBI grade | Child-Pugh score | No. of patients (%) | <i>p</i> value |
|------------|------------------|---------------------|----------------|
| 1 (n=33)   | 5                | 30 (90.9)           | <0.001         |
|            | 6                | 3 (9.1)             |                |
| 2-3 (n=40) | 5                | 10 (25.0)           |                |
|            | 6                | 21 (52.5)           |                |
|            | 7                | 8 (20.0)            |                |
|            | 8                | 1 (2.5)             |                |

Supplementary Table S1-2. The detailed relationship between pretreatment Child-Pugh grade and ALBI score

| Child-Pugh grade | ALBI score (median, range) | <i>p</i> value |
|------------------|----------------------------|----------------|
| A (n=64)         | -2.61 (-3.29--1.67)        | <0.001         |
| B (n=9)          | -2.11 (-2.30--0.89)        |                |

\* Albumin-bilirubin

Supplementary Table S2. Univariate and multivariate Cox proportional hazards associations between clinical factors and survival outcomes

| Variable                                  | Progression-free survival |                |                       |                | Overall survival    |                |                       |                |
|-------------------------------------------|---------------------------|----------------|-----------------------|----------------|---------------------|----------------|-----------------------|----------------|
|                                           | Univariate analysis       |                | Multivariate analysis |                | Univariate analysis |                | Multivariate analysis |                |
|                                           | HR (95% CI)               | <i>P</i> value | HR (95% CI)           | <i>P</i> value | HR (95% CI)         | <i>P</i> value | HR (95% CI)           | <i>P</i> value |
| Age at TACE+RT ≤60 vs > 60                | 0.571 (0.338-0.964)       | 0.036          | 0.709 (0.405-1.240)   | 0.228          | 1.029 (0.549-1.927) | 0.930          |                       |                |
| Gender                                    | 1.122 (0.346-3.632)       | 0.848          |                       |                | 2.077 (0.633-6.818) | 0.228          |                       |                |
| ECOG 0-1vs2-3                             | 1.201 (0.680-2.122)       | 0.527          |                       |                | 1.399 (0.696-2.818) | 0.346          |                       |                |
| mUICC stage 1-3 vs 4A                     | 1.640 (0.997-2.698)       | 0.051          | 1.374 (0.812-2.325)   | 0.237          | 2.703 (1.374-5.319) | 0.004          | 2.449 (1.236-4.854)   | 0.010          |
| Pre-TACE AFP (ng/mL) ≤80vs>80             | 1.518 (0.921-2.503)       | 0.102          |                       |                | 1.108 (0.597-2.059) | 0.745          |                       |                |
| Pre-TACE PIVKA-II (mAU/mL) ≤496.5vs>496.5 | 1.305 (0.748-2.278)       | 0.349          |                       |                | 1.150 (0.558-2.370) | 0.705          |                       |                |
| Pre-TACE Child-Pugh grade                 | 1.503 (0.727-3.107)       | 0.272          |                       |                | 1.222 (0.540-2.768) | 0.631          |                       |                |
| Pre-TACE ALBI score                       | 2.319 (1.343-4.007)       | 0.003          | 2.073 (1.188-3.617)   | 0.010          | 2.814 (1.463-5.412) | 0.002          | 2.463 (1.278-4.749)   | 0.007          |

Abbreviations: HR, Hazard ratio; CI, Confidence interval; TACE, Transarterial chemoembolization; RT, Radiotherapy; ECOG, Eastern Cooperative Oncology Group; mUICC, modified Union for International Cancer Control; AFP, Alpha-Fetoprotein; PIVKA-II, Prothrombin induced by vitamin K absence-II; ALBI, Albumin-bilirubin.

Supplementary Table S3. Pattern of change in ALBI grade after the treatment

| Before TACE+RT      | 1-2 months after TACE+RT | No. of patients (%) |
|---------------------|--------------------------|---------------------|
| ALBI grade 1 (n=33) | ALBI grade 1             | 21 (63.6)           |
|                     | ALBI grade 2             | 12 (36.4)           |
| ALBI grade 2 (n=39) | ALBI grade 1             | 6 (15.4)            |
|                     | ALBI grade 2             | 28 (71.8)           |
|                     | ALBI grade 3             | 5 (12.8)            |
| ALBI grade 3 (n=1)  | ALBI grade 2             | 1 (100.0)           |

Abbreviations: TACE, Transarterial chemoembolization; RT, Radiotherapy; ALBI, Albumin-bilirubin.
